# Supplementary material for: Crystal Structure of the FAD-Containing Ferredoxin-NADP+Reductase from the Plant PathogenXanthomonas axonopodispv. citri
Source: Hindawi journal article supplement (doi:10.1155/2013/906572), 2013-01-01
Supplement: f1 [file 906572.f1.pdf]

Table S1. Kinetic parameters of NADPH diaphorase reaction for several FNRs and the dissociation constants for complexes with NADP<sup>+</sup>

| FNR                               | $K_m$ ( $\mu\text{M}$ ) | $k_{\text{cat}}$ ( $\text{s}^{-1}$ ) | $k_{\text{cat}}/K_m$ ( $\mu\text{M}^{-1} \text{s}^{-1}$ ) | $K_d$ ( $\mu\text{M}$ ) |
|-----------------------------------|-------------------------|--------------------------------------|-----------------------------------------------------------|-------------------------|
| <i>X. axonopodis</i> <sup>a</sup> | 10.8±0.5                | 121.9±1.8                            | 11.3                                                      | 9.7±0.4                 |
| pea <sup>a</sup>                  | 15.3±4.3                | 374.3±18                             | 24.5                                                      | 10.9±3.1                |
| <i>E.coli</i> <sup>a</sup>        | 8.3±1.3                 | 38.2±3.5                             | 4.6                                                       | 5.9±0.6                 |
| <i>R. capsulatus</i>              | 80 <sup>b</sup>         | 7.2 <sup>b</sup>                     | 0.09                                                      | 222±5 <sup>c</sup>      |
| <i>P. putida</i> <sup>d</sup>     | 4.79±0.08               | 4.77±0.17                            | 1.03±0.02                                                 | -                       |
|                                   | 3.97±0.04               | 4.51±0.06                            | 1.14±0.08                                                 | -                       |

<sup>a</sup> Data from Tondo M.L. et al., PLoS One 2011; 6: e27124.

<sup>b</sup> Data from Bittel C. et al., FEBS Lett 2003; 553: 408–412.

<sup>c</sup> Data from Bortolotti A. et al., BBA 2009; 1794: 199-210.

<sup>d</sup> Data from Yeom J. et al., J. Biochem 2009; 145: 481-491. Data for FprA (first line), homologue with the *A. vinelandii* FPR and FprB (second line), homologue with the *E.coli* FPR.

Figure S1

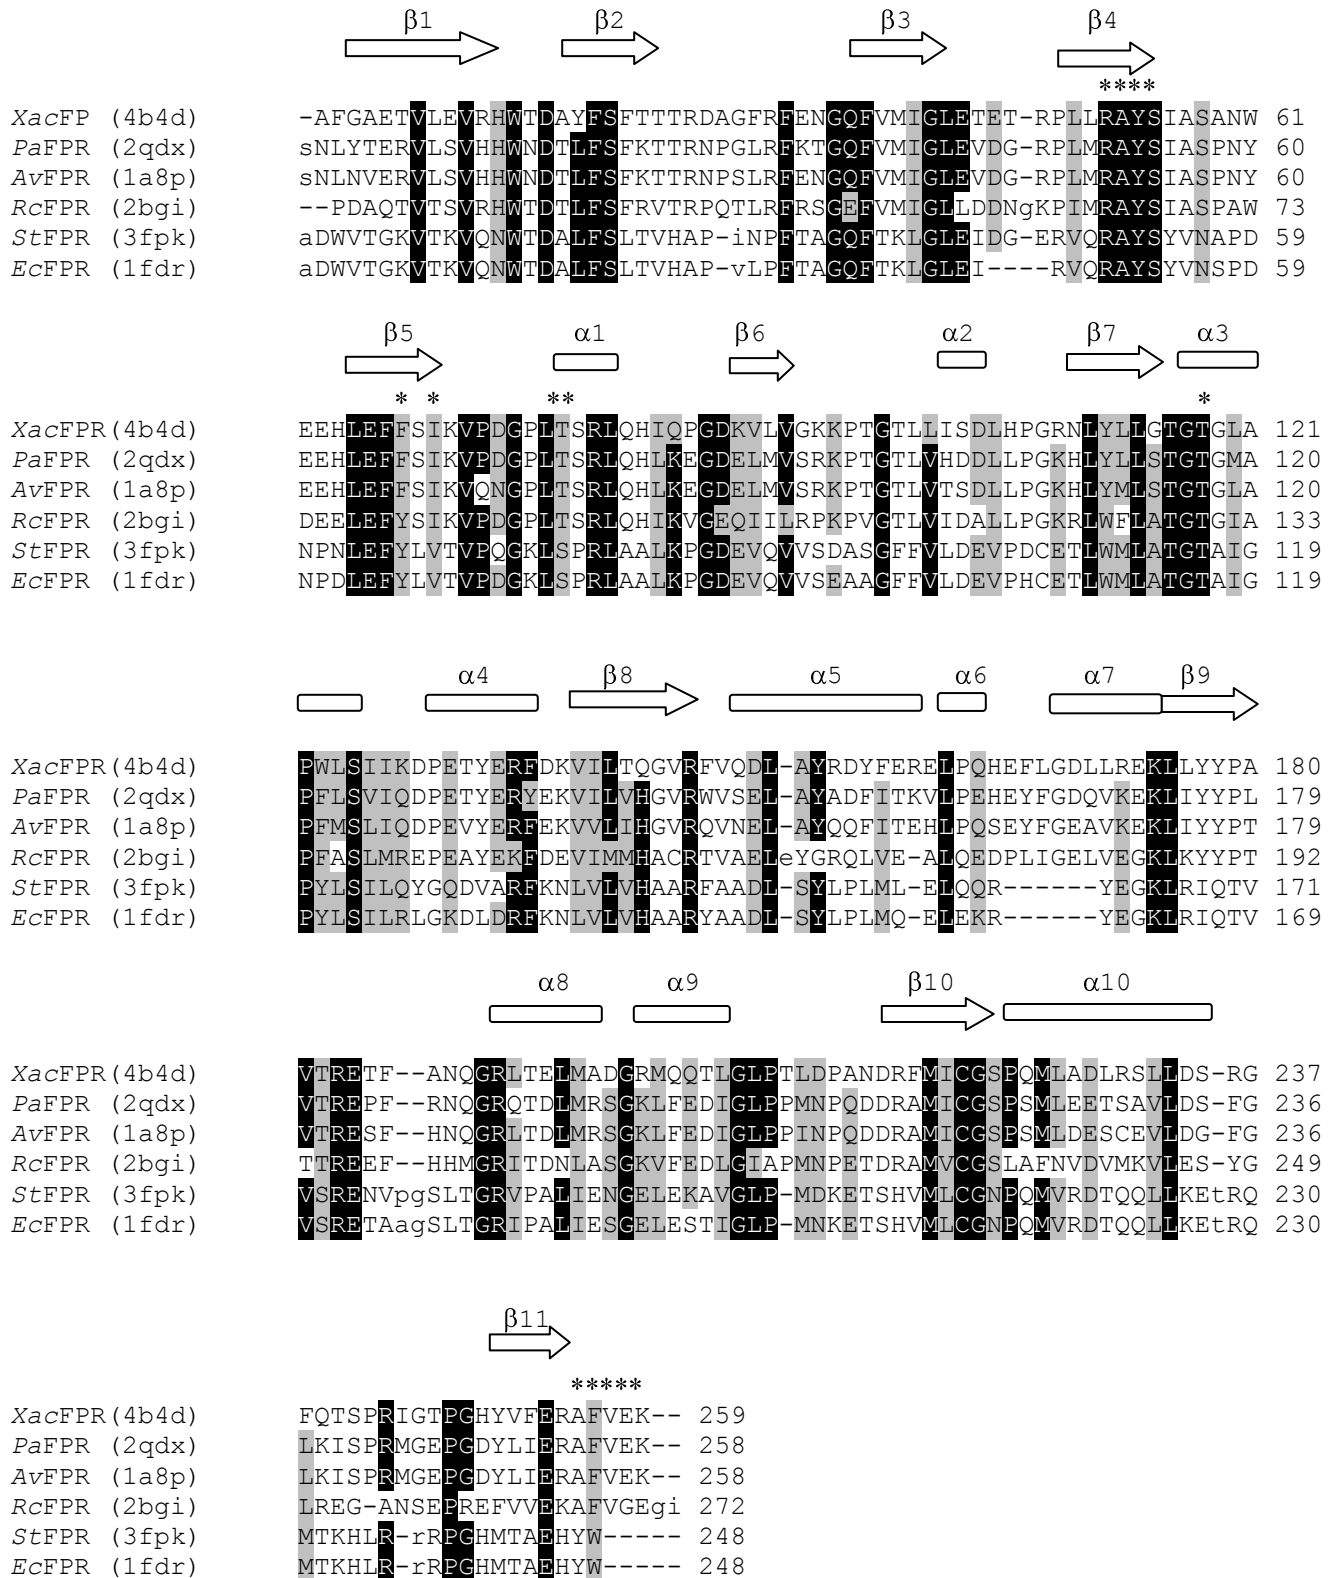

**Figure S1:** Structure-based sequence alignment of several bacterial FPRs by DALI Server. Secondary structure for *XacFPR* stated by the SMM server. Pa, *P. aeruginosa* (subclass IA); Av, *A. vinelandii* (subclass IA); Rc, *R. capsulatus* (subclass IB); St, *Salmonella typhimurium* (subclass II); Ec, *E. coli* (subclass II). Residues of *XacFPR* that interact with FAD are pointed with an asterisk on top.
